# Supplementary material
Source: PubMed Central journal article supplement (PMC7499049)
Supplement: AEM.01251-20-s0001.pdf [file AEM.01251-20-s0001.pdf]

**Table S1. Concentration ( $\mu\text{M}$ ) of accumulating precursors and pathway end products in engineered strains of *Neosartorya fumigata* (*N.f.*) and *Metarhizium brunneum* (*M.b.*) 10 days post inoculation**

| Species and pathway end product | Agroclavine     | LA <sup>a</sup> | Festuclovine      | DHLA <sup>b</sup> | dihydroLAH <sup>c</sup> |
|---------------------------------|-----------------|-----------------|-------------------|-------------------|-------------------------|
| <i>N.f.</i> LA                  | 7.76 $\pm$ 1.87 | 0.19 $\pm$ 0.08 | n.d. <sup>d</sup> | n.d.              | n.d.                    |
| <i>M.b.</i> LA                  | 0.61 $\pm$ 0.06 | 4.12 $\pm$ 0.54 | n.d.              | n.d.              | n.d.                    |
| <i>N.f.</i> DHLA                | n.d.            | n.d.            | 4.10 $\pm$ 0.94   | 0.11 $\pm$ 0.02   | n.d.                    |
| <i>M.b.</i> DHLA                | n.d.            | n.d.            | 0.08 $\pm$ 0.01   | 0.48 $\pm$ 0.29   | n.d.                    |
| <i>M.b.</i> dihydroLAH          | n.d.            | n.d.            | n.d.              | 0.23 $\pm$ 0.09   | 0.04 $\pm$ 0.01         |

<sup>a</sup>lysergic acid

<sup>b</sup>dihydrolysergic acid

<sup>c</sup>provisional dihydrolysergic acid  $\alpha$ -hydroxyethylamide

<sup>d</sup>not detected

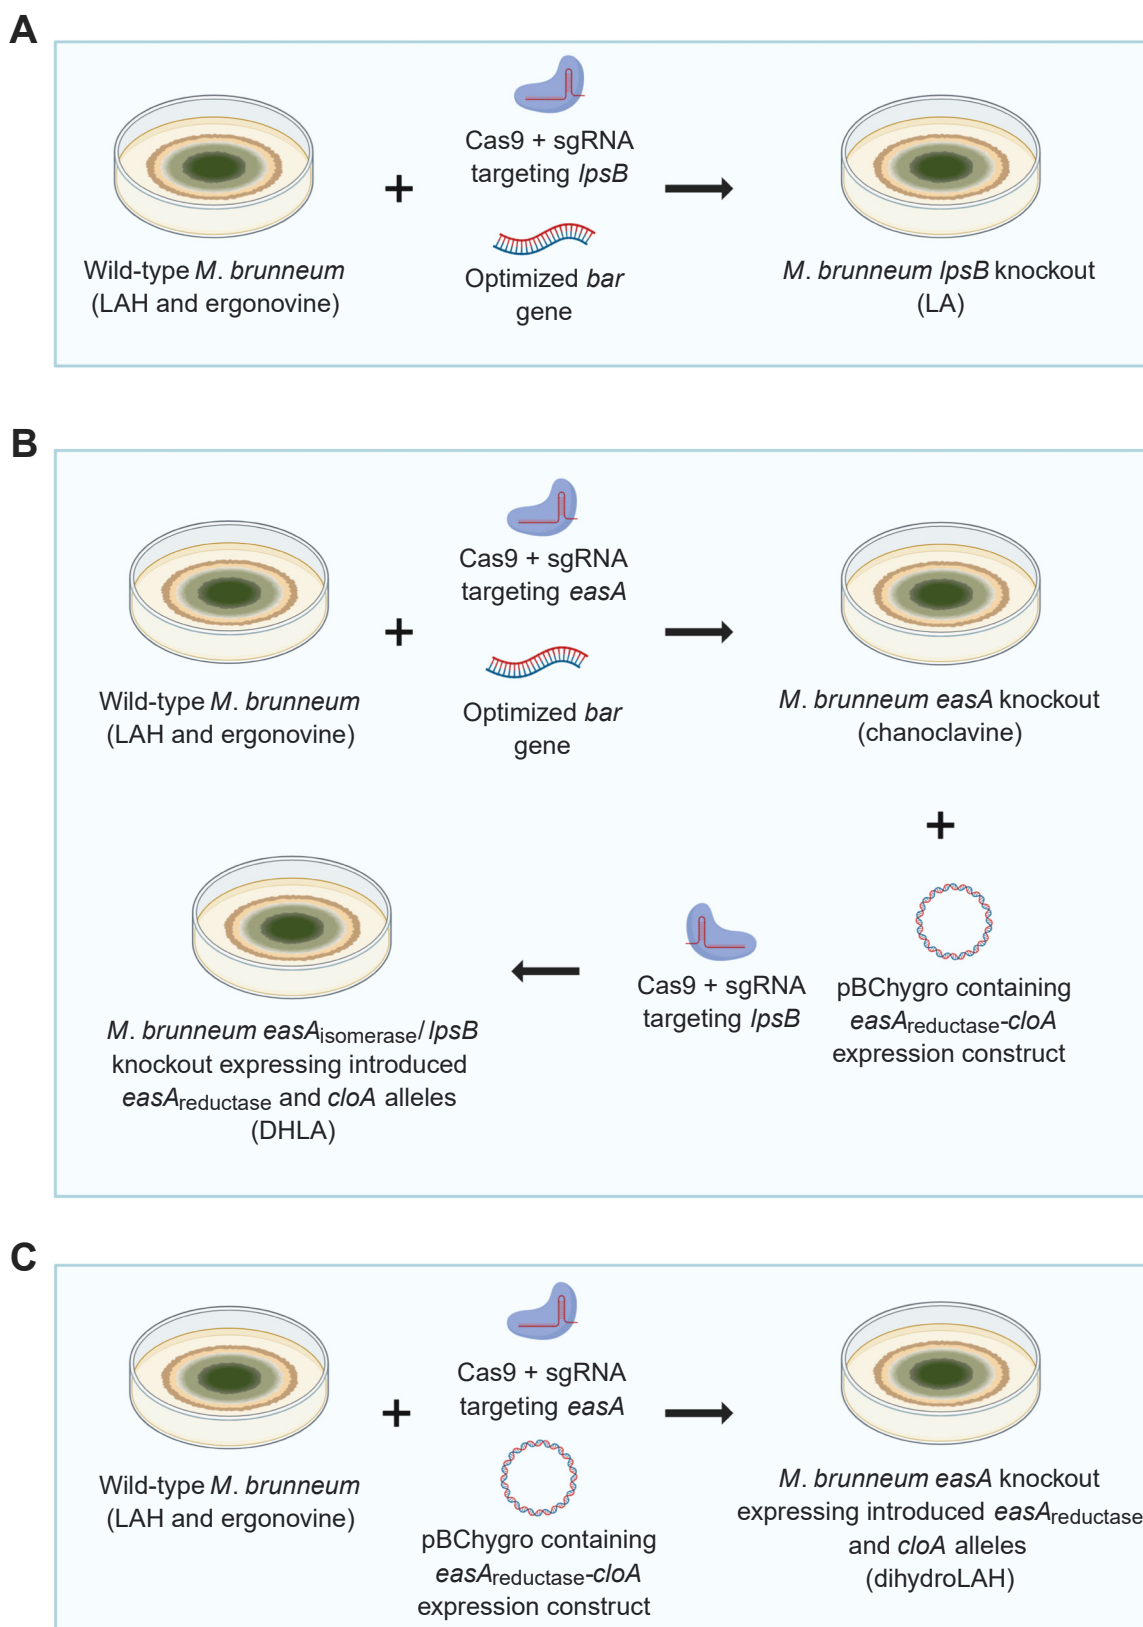

**Fig S1. Strategies for engineering mutant strains of *M. brunneum*.** Strains are listed with their terminal alkaloid product appearing in parentheses. **(A)** Strategy for engineering the LA-producing strain of *M. brunneum*. **(B)** Strategy for engineering the DHHLA-producing strain of *M. brunneum*. **(C)** Strategy for engineering the provisional dihydroLAH-producing strain of *M. brunneum*. LAH, lysergic acid  $\alpha$ -hydroxyethylamide; LA, lysergic acid; DHHLA, dihydrolysergic acid; dihydroLAH, dihydrolysergic acid  $\alpha$ -hydroxyethylamide. Created with BioRender.com.

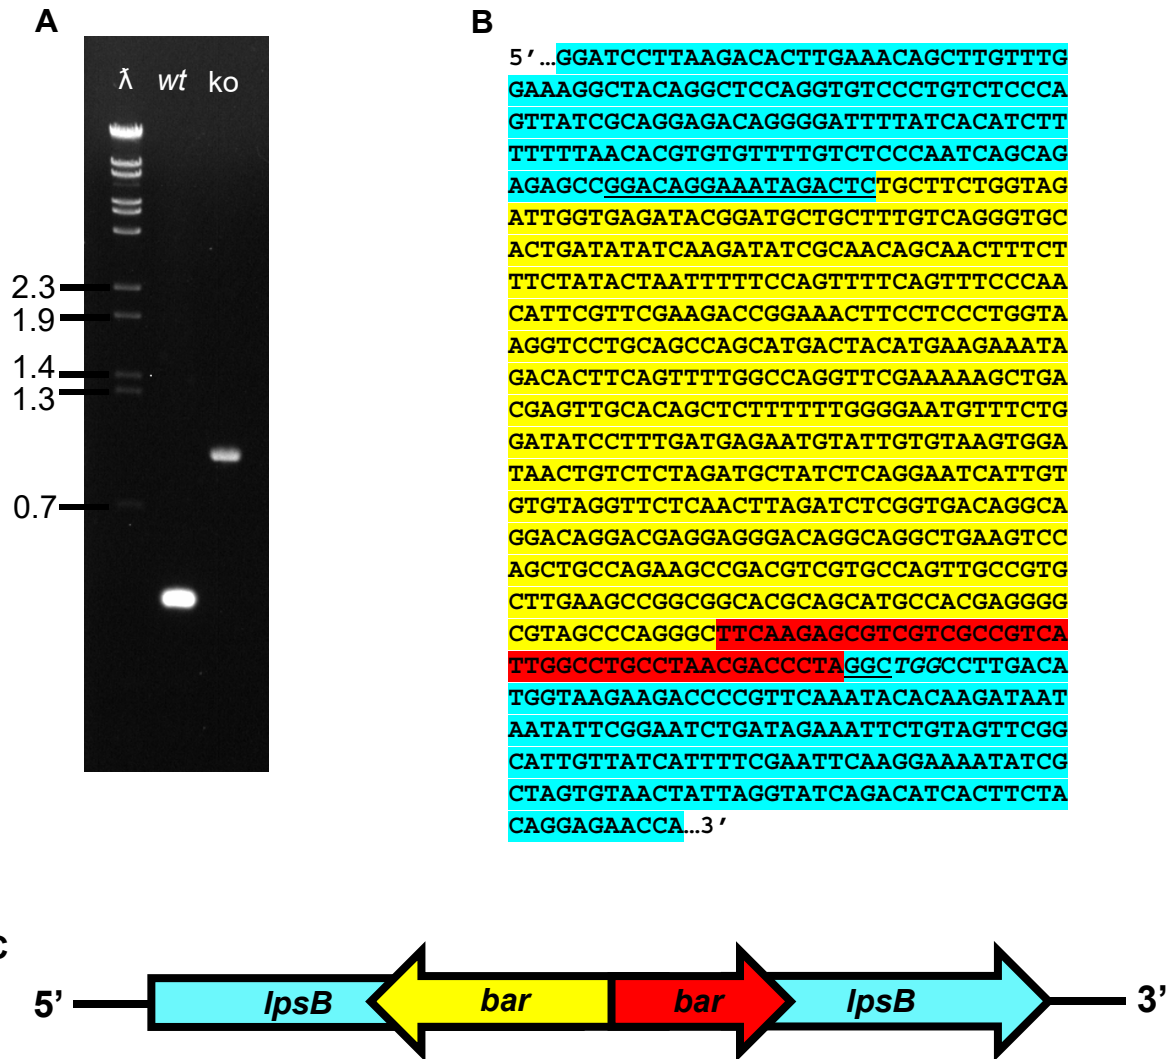

**Fig S2. PCR analysis of *M. brunneum* *lpsB* locus following gene knockout.** (A) PCR products from primer combination 7 (listed in Table 1) and genomic DNA isolated from wild type (wt) and *lpsB* knockout (ko) strains of *M. brunneum*. Sizes of relevant fragments from *Bst*EII-digested bacteriophage lambda DNA are indicated to the left. Gel was stained with ethidium bromide. (B) DNA sequence of *lpsB* locus after CRISPR mutagenesis. Blue highlight indicates sequences flanking the site of CRISPR-Cas9 recombination. Yellow highlight represents sequence fragment from optimized *bar* selectable marker. Red highlight represents another truncated fragment of *bar* marker present in the locus. Target sequence is underlined and protospacer-adjacent motif (PAM) is italicized. (C) Graphic displaying the orientation and components integrated into the cut sites for this mutant. Two partial fragments of the *bar* marker with different lengths and divergent orientations are shown to have integrated.

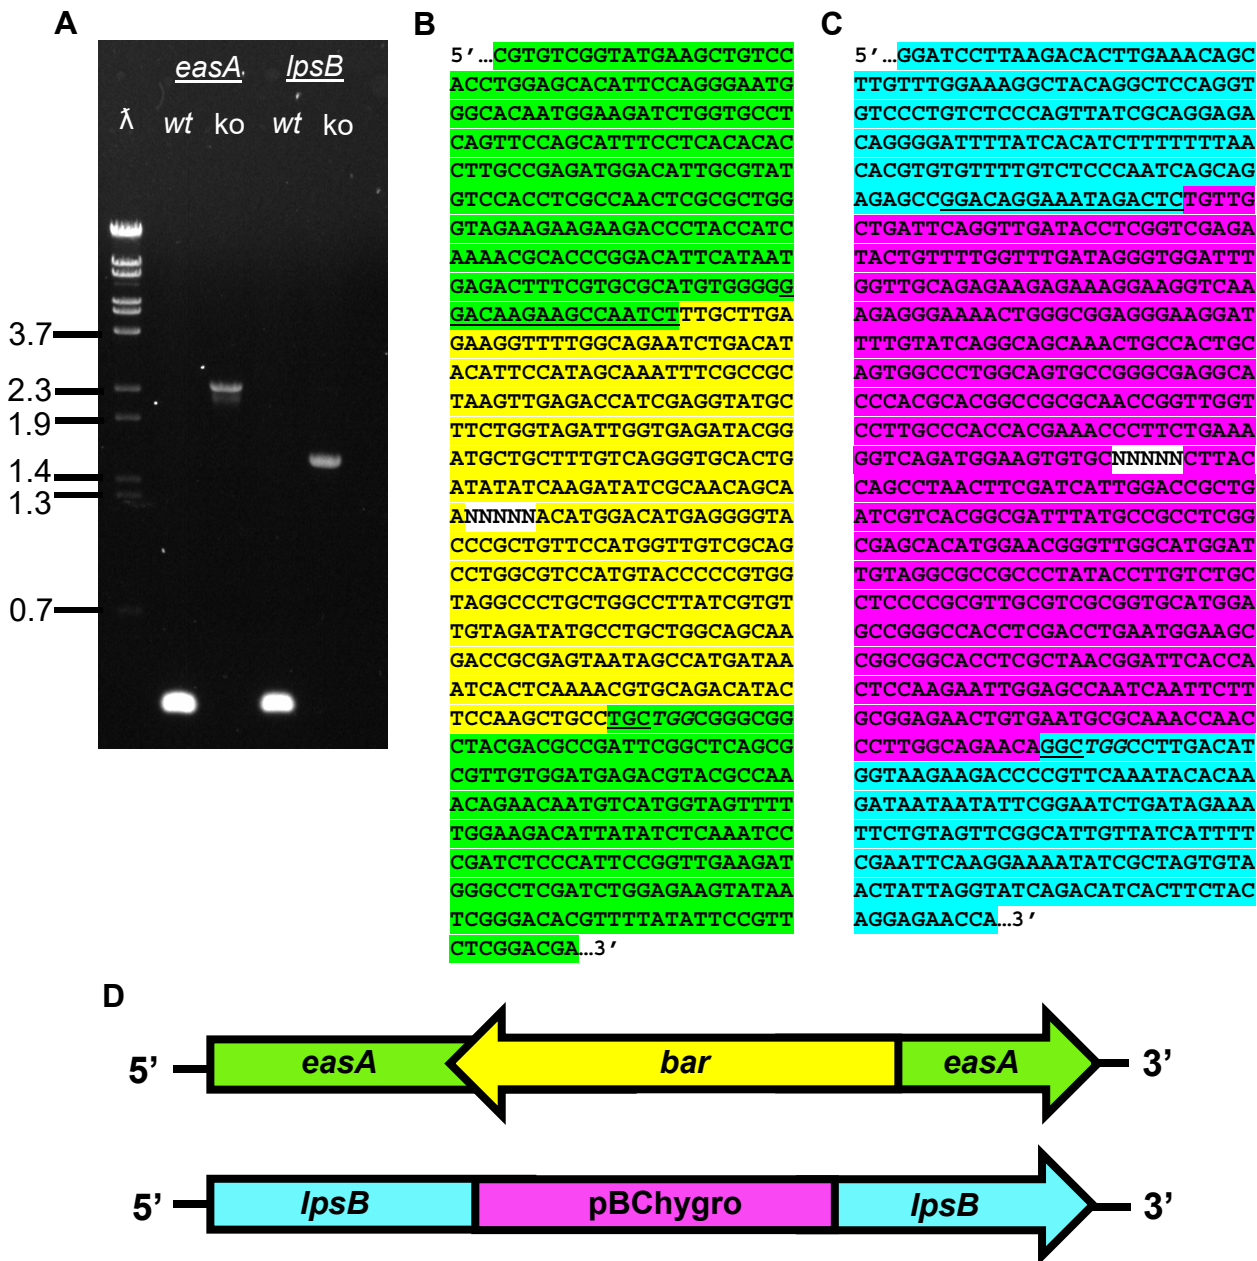

**Fig S3. PCR analysis of *M. brunneum easA* and *lpsB* loci following gene knockout and transformation with *bar* marker and dihydro expression construct. (A) PCR products from primer combinations 7 or 8 (Table 1) and genomic DNA isolated from wild type (wt) and DHLA-producing (ko) strains of *M. brunneum*. Sizes of relevant fragments from *Bst*EII-digested bacteriophage lambda DNA are indicated to the left. Gel was stained with ethidium bromide. (B) DNA sequence of *easA* locus after CRISPR mutagenesis. Green highlight indicates sequences flanking the site of CRISPR-Cas9 recombination. Yellow highlight represents *bar* marker integrated in opposite orientation present in the locus. Target sequence is underlined and protospacer-adjacent motif (PAM) is italicized. (C) DNA sequence of *lpsB* locus after CRISPR mutagenesis concomitant with introduction of the dihydro construct. Blue highlight indicates sequences flanking the site of CRISPR-Cas9 recombination. Pink highlight represents fragment from pBChygro portion of the dihydro expression construct with 612 nt omitted (represented by NNNNN) to simplify presentation. Target sequence is underlined and protospacer-adjacent motif (PAM) is italicized. (D) Graphics displaying the orientation and components integrated into cut sites for both mutant loci.**

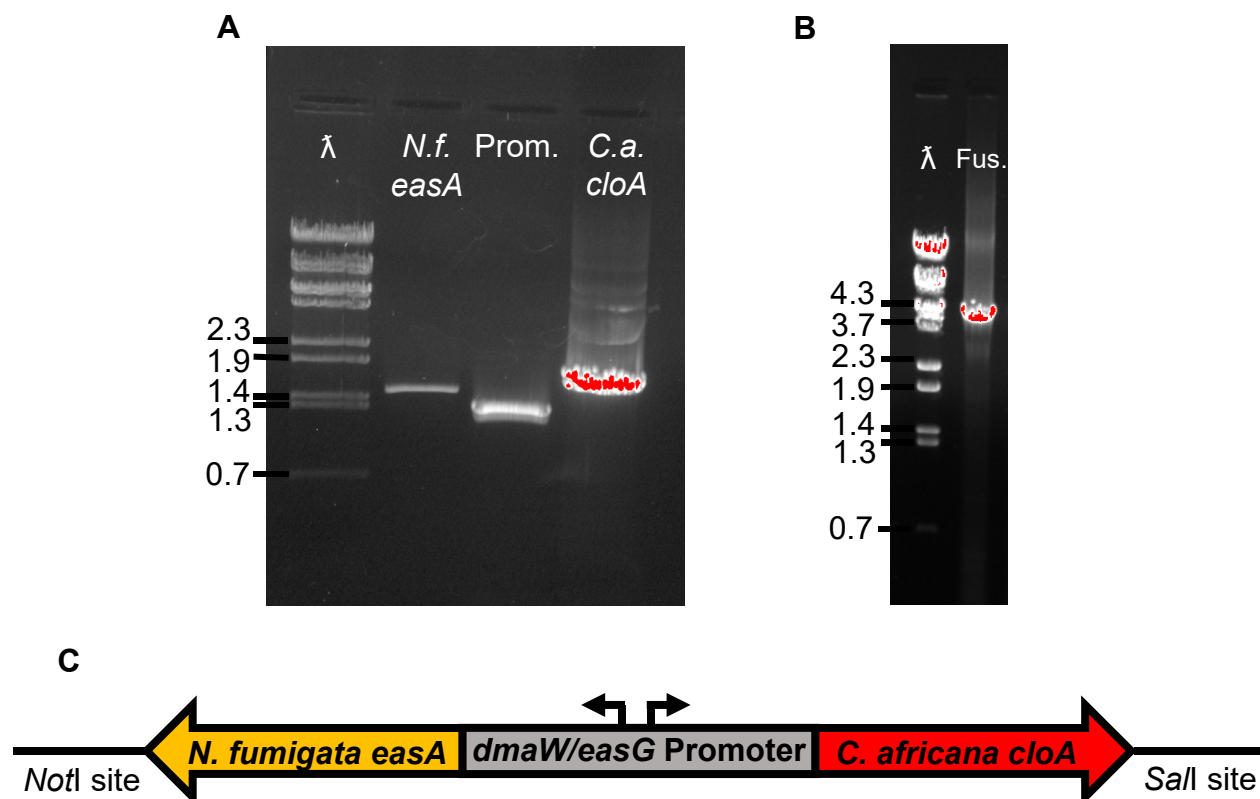

**Fig S4. Construction of the dihydro expression construct prior to ligation into pBChygro. (A)** Products from primer combinations 2, 3, and 4 (Table 1) prior to fusion PCR. Sizes of relevant fragments from *BstEII*-digested bacteriophage lambda DNA are indicated to the left of either gel. Gel was stained with ethidium bromide. Red tint indicates saturated pixels detected by imaging software. **(B)** Fusion product from PCR primer combination 5, prior to ligation into pBChygro. Fus., *easA*<sub>reductase</sub>-promoter-*cloA* fusion product. **(C)** Graphic displaying the orientation and components of the dihydro expression construct.

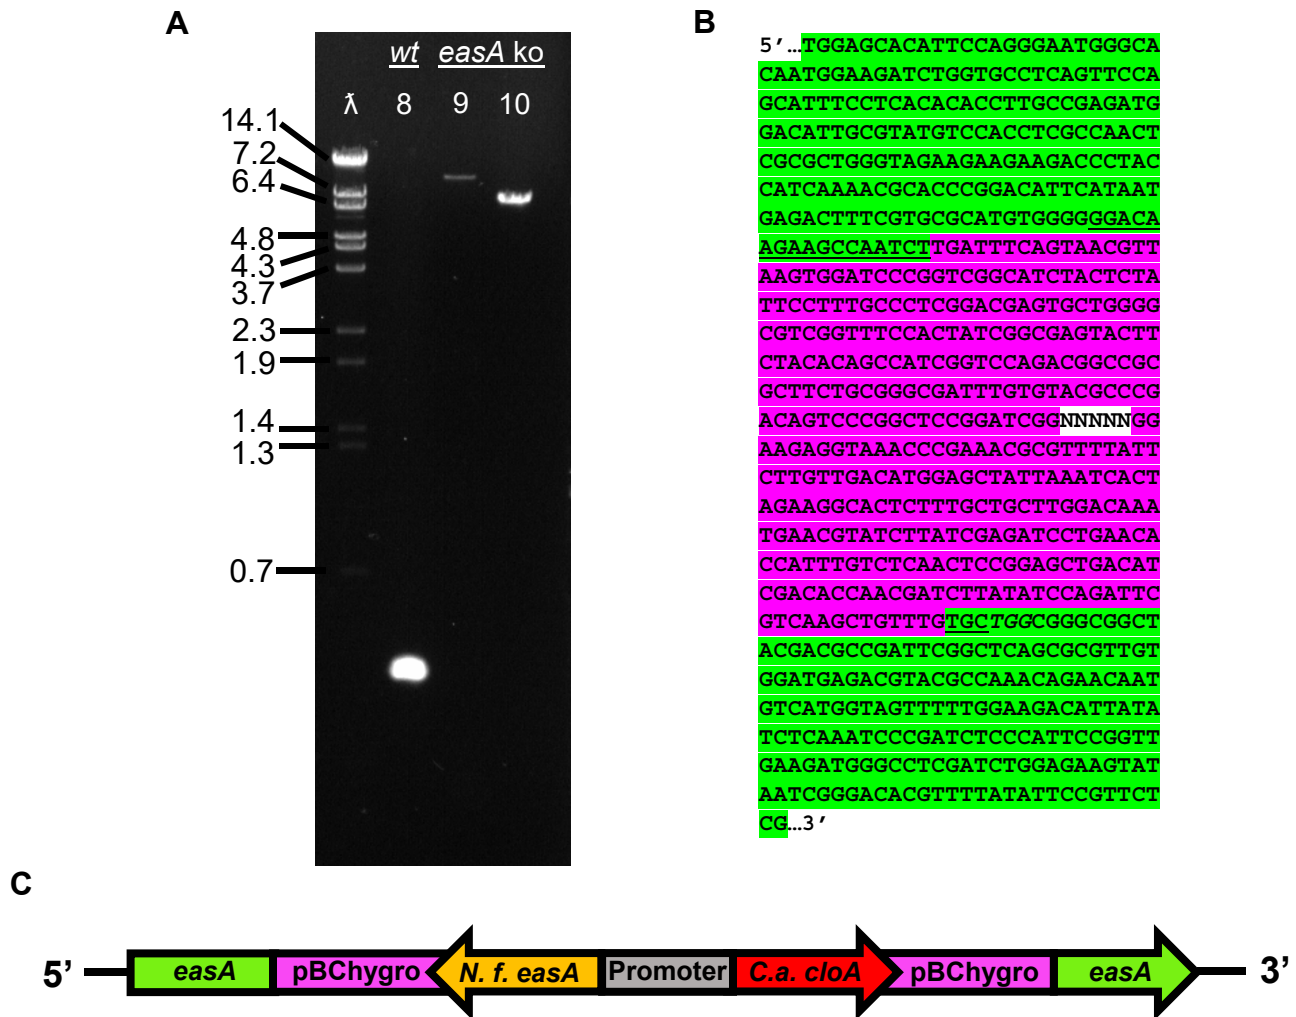

**Fig S5. PCR analysis of *M. brunneum* *easA* locus following gene knockout and transformation with dihydro expression construct. (A)** Products from primer combinations 8, 9, or 10 (Table 1) and genomic DNA isolated from wild type (wt) and dihydroLAH-producing strains (*easA* ko) of *M. brunneum*. Primer combination is listed in each lane below the corresponding strain. Sizes of relevant fragments from *Bst*EII-digested bacteriophage lambda DNA are indicated to the left. Gel was stained with ethidium bromide. **(B)** DNA sequence of *easA* locus after CRISPR mutagenesis concomitant with introduction of the dihydro construct. Green highlight indicates sequences flanking the site of CRISPR-Cas9 recombination. Pink highlight represents sequence from dihydro expression construct with 11,090 nt omitted (represented by NNNNN) to simplify presentation. Target sequence is underlined and protospacer-adjacent motif (PAM) is italicized. **(C)** Graphic displaying the orientation and components integrated into cut sites for this mutant.
